# Supplementary material
Source: PubMed Central journal article supplement (PMC1283370)
Supplement: pbio.0030339.st001.pdf [file pbio.0030339.st001.pdf]

| Population                                    | Latitude | Longitude | $\Delta^{32}$ Frequency | Sample Size | Reference                   |
|-----------------------------------------------|----------|-----------|-------------------------|-------------|-----------------------------|
| Mordvinians from Saransk (Russia)             | 54       | 45        | 0.163                   | 86          | Limborska et al. (2002)     |
| Byelorussians (Byelorussia)                   | 54       | 24        | 0.16                    | 80          | Limborska et al. (2002)     |
| Finns from Helsinki (Finland)                 | 60       | 25        | 0.158                   | 98          | Limborska et al. (2002)     |
| Tatars from Elabuga (Russia)                  | 56       | 52        | 0.156                   | 45          | Limborska et al. (2002)     |
| Swedes from Umea (Sweden)                     | 64       | 19        | 0.142                   | 204         | Limborska et al. (2002)     |
| Russians from Moscow (Russia)                 | 56       | 38        | 0.139                   | 50          | Limborska et al. (2002)     |
| Bretons from Bretagne (France)                | 49       | 1         | 0.136                   | 107         | Limborska et al. (2002)     |
| Estonia-Mainland                              | 59       | 26        | 0.13                    | 250         | Kalev et al. (2000)         |
| French from Paris (France)                    | 48       | 2         | 0.129                   | 294         | Limborska et al. (2002)     |
| Russians from Ryazan (Russia)                 | 55       | 40        | 0.12                    | 78          | Limborska et al. (2002)     |
| Tatars (Russia)                               | 56       | 49        | 0.12                    | 40          | Limborska et al. (2002)     |
| Leuven Belgium                                | 51       | 5         | 0.119                   | 310         | Struyf et al. (2000)        |
| Lithuanians from Vilnius (Lithuania)          | 54       | 25        | 0.115                   | 283         | Limborska et al. (2002)     |
| Tatars from Almetyevsk (Russia)               | 55       | 52        | 0.115                   | 48          | Limborska et al. (2002)     |
| Udmurts from Malo-Purginski district (Russia) | 57       | 53        | 0.115                   | 52          | Limborska et al. (2002)     |
| Population of Nancy and Strasbourg (France)   | 48       | 7         | 0.111                   | 291         | Limborska et al. (2002)     |
| Danes from Copenhagen (Denmark)               | 56       | 12        | 0.11                    | 100         | Limborska et al. (2002)     |
| Ukrainians from Kiev (Ukraine)                | 49       | 24        | 0.11                    | 83          | Limborska et al. (2002)     |
| French from Lille region (France)             | 49       | 3         | 0.109                   | 101         | Limborska et al. (2002)     |
| Mulheim Germany                               | 51       | 7         | 0.106                   | 99          | Lucotte and Mercier (1998b) |
| Norwegians from Oslo (Norway)                 | 60       | 10        | 0.105                   | 100         | Limborska et al. (2002)     |
| French from Montpellier (France)              | 44       | 3         | 0.101                   | 99          | Limborska et al. (2002)     |
| French from south of France                   | 44       | 5         | 0.098                   | 326         | Limborska et al. (2002)     |
| Ukrainians from Lvov (Ukraine)                | 50       | 30        | 0.096                   | 88          | Limborska et al. (2002)     |
| Mari from Zvenigovski district (Russia)       | 56       | 48        | 0.096                   | 47          | Limborska et al. (2002)     |
| Belgians from Brussels (Belgium)              | 50       | 4         | 0.092                   | 704         | Limborska et al. (2002)     |
| Ukrainians from Lugansk (Ukraine)             | 48       | 39        | 0.091                   | 86          | Limborska et al. (2002)     |

Data Table Continued

| Population                                         | Latitude | Longitude | $\Delta 32$ Frequency | Sample Size | Reference                   |
|----------------------------------------------------|----------|-----------|-----------------------|-------------|-----------------------------|
| French from Champagne-Ardenne (France)             | 47       | 5         | 0.087                 | 276         | Limborska et al. (2002)     |
| Italians in Milan (Italy)                          | 45       | 9         | 0.087                 | 98          | Limborska et al. (2002)     |
| Basques (Spain)                                    | 44       | 4         | 0.086                 | 29          | Limborska et al. (2002)     |
| Hungarians from Budapest (Hungary)                 | 47       | 18        | 0.086                 | 99          | Limborska et al. (2002)     |
| Bern Switzerland                                   | 47       | 7         | 0.085                 | 64          | Lucotte and Mercier (1998b) |
| Uzbekistan                                         | 41       | 69        | 0.085                 | 40          | Limborska et al. (2002)     |
| Swedish Saamis from Lapland (Sweden)               | 67       | 23        | 0.083                 | 120         | Limborska et al. (2002)     |
| Catalonia (Spain)                                  | 36       | 4         | 0.082                 | 49          | Limborska et al. (2002)     |
| Moldavians from Kishinev (Moldavia)                | 47       | 29        | 0.08                  | 56          | Limborska et al. (2002)     |
| Barcelona Spain                                    | 42       | 1         | 0.071                 | 98          | Lucotte and Mercier (1998b) |
| Catalans from Perpignan region (France)            | 43       | 2         | 0.069                 | 102         | Limborska et al. (2002)     |
| Portugese from Lisbon (Portugal)                   | 38       | -9        | 0.064                 | 101         | Limborska et al. (2002)     |
| Daghestan (Russia)                                 | 43       | 47        | 0.064                 | 110         | Limborska et al. (2002)     |
| Turks from Ankara (Turkey)                         | 39       | 32        | 0.063                 | 104         | Limborska et al. (2002)     |
| Basques from Bilbao (Spain)                        | 43       | -3        | 0.062                 | 89          | Limborska et al. (2002)     |
| Komi Ziryanes from Sisolski district (Russia)      | 61       | 50        | 0.06                  | 50          | Limborska et al. (2002)     |
| Kazakstan                                          | 43       | 77        | 0.06                  | 50          | Limborska et al. (2002)     |
| Mordvinians from Staroshayginski district (Russia) | 54       | 44        | 0.059                 | 51          | Limborska et al. (2002)     |
| Italy (Rome)                                       | 42       | 13        | 0.055                 | 91          | Limborska et al. (2002)     |
| Porto Portugal                                     | 41       | -9        | 0.052                 | 124         | Lucotte and Mercier (1998b) |
| Nice France                                        | 44       | 6         | 0.052                 | 124         | Lucotte and Mercier (1998a) |
| Chuvashes from Morgaushevski district (Russia)     | 56       | 47        | 0.051                 | 79          | Limborska et al. (2002)     |
| Bashkirs from Sterlibashevski district (Russia)    | 56       | 55        | 0.051                 | 49          | Limborska et al. (2002)     |
| Crimea Tatars from Crimea (Ukraine)                | 46       | 34        | 0.05                  | 90          | Limborska et al. (2002)     |
| Azerbaijan                                         | 41       | 49        | 0.05                  | 40          | Limborska et al. (2002)     |
| Bashkirs from Ilishevski district (Russia)         | 55       | 54        | 0.05                  | 50          | Limborska et al. (2002)     |

Data Table Continued

| Population                                   | Latitude | Longitude | $\Delta 32$ Frequency | Sample Size | Reference                 |
|----------------------------------------------|----------|-----------|-----------------------|-------------|---------------------------|
| Padua Italy                                  | 45       | 11        | 0.047                 | 371         | Zamarchi et al. (1999)    |
| Athens Greece                                | 39       | 23        | 0.042                 | 143         | Magierowska et al. (1998) |
| Uigur (Russia)                               | 51       | 90        | 0.04                  | 50          | Limborska et al. (2002)   |
| Tuva republic (Russia)                       | 52       | 95        | 0.03                  | 50          | Limborska et al. (2002)   |
| Pakistan                                     | 30       | 70        | 0.029                 | 34          | Limborska et al. (2002)   |
| Bashkirs from Abselilovski district (Russia) | 53       | 59        | 0.025                 | 60          | Limborska et al. (2002)   |
| Iran                                         | 32       | 53        | 0.024                 | 84          | Voevodin et al. (1998)    |
| Bashkirs from Arkhangelski district (Russia) | 54       | 57        | 0.022                 | 46          | Limborska et al. (2002)   |
| Saudi Arabia                                 | 25       | 41        | 0.021                 | 241         | Limborska et al. (2002)   |
| Basques from Biarritz (France)               | 43       | 0         | 0.018                 | 111         | Limborska et al. (2002)   |
| Sindh                                        | 26       | 69        | 0.017                 | 29          | Limborska et al. (2002)   |
| Morocco                                      | 32       | -5        | 0.015                 | 167         | Elharti et al. (2000)     |
| Punjab                                       | 32       | 73        | 0.015                 | 34          | Limborska et al. (2002)   |
| Syria                                        | 35       | 38        | 0.014                 | 106         | Voevodin et al. (1998)    |
| Tunisia                                      | 34       | 9         | 0.01                  | 145         | Barbouche et al. (2001)   |
| Georgia                                      | 42       | 45        | 0.0                   | 50          | Limborska et al. (2002)   |
| Bengal                                       | 24       | 90        | 0.0                   | 25          | Limborska et al. (2002)   |
| Mongolia                                     | 48       | 107       | 0.0                   | 59          | Limborska et al. (2002)   |

## References

- Alvarez V, Lopez-Larrea C, Coto E (1998). Mutational analysis of the CCR5 and CXCR4 genes (HIV-1 co-receptors) in resistance to HIV-1 infection and AIDS development among intravenous drug users. *Human genetics* 102(4): 483–486.
- Barbouche R, Hong L, Dellagi K, Kostrikis L (2001). Contrasting frequencies of CCR5-Delta32 and CCR2-64i allele in Tunisian populations. *JAIDS* 26: 298–299.
- Elharti E, Elaouad R, Simons MJ, Messouak-Elhachimi Z, Gluckman JC, et al. (2000). Frequency of the CCR5 delta 32 allele in the Moroccan population. *AIDS Research and Human Retroviruses* 16(1): 87–89.
- Kalev I, Mikelsaar AV, Beckman L, Tasa G, Parlist P (2000). High frequency of the HIV-1 protective CCR5 delta 32 deletion in native Estonians. *European journal of epidemiology* 16(12): 1107–1109.
- Limborska SA, Balanovsky OP, Balanovskaya EV, Slominsky PA, Schadrina MI, et al. (2002). Analysis of CCR5 delta 32 geographic distribution and its correlation with some climatic and geographic factors. *Human heredity* 53(1): 49–54.
- Lucotte G, Mercier G (1998a). Delta 32 mutation frequencies of the CCR5 coreceptor in different French regions. *Comptes Rendus De L Academie Des Sciences Serie I Sciences De La Vie Life Sciences* 321(5): 409–413.
- Lucotte G, Mercier G (1998b). Distribution of the CCR5 gene 32-bp deletion in Europe. *Journal of Acquired Immune Deficiency Syndromes and Human Retrovirology* 19(2): 174–177.
- Magierowska M, Lepage V, Boubnova L, Carcassi C, de Juan D, et al. (1998). Distribution of the CCR5 gene 32 base pair deletion and sdf1-3' a variant in healthy individuals from different populations. *Immunogenetics* 48(6): 417–419.
- Ruiz A, Royo J, Rubio A, Borrego S, Leal M, et al. (2001). Spectrofluorimetric analysis of CCR5-Delta 32 allele using real-time polymerase chain reaction: prevalence in southern Spanish HIV+ patients and noninfected population. *AIDS Res Hum Retroviruses* 17: 191–193.
- Struyf F, Thoelen I, Charlier N, Keyaerts E, Van der Donck I, et al. (2000). Prevalence of CCR5 and CCR2 HIV-coreceptor gene polymorphisms in Belgium. *Hum Hered* 50: 304–307.
- Voevodin A, Samilchuk E, Dashti S (1998). A survey for 32 nucleotide deletion in the CCR-5 chemokine receptor gene (delta CCR-5) conferring resistance to human immunodeficiency virus type 1 in different ethnic groups and in chimpanzees. *Journal of medical virology* 55(2): 147–151.

Zamarchi R, Indraccolo S, Minuzzo S, Coppola V, Gringeri A, et al. (1999). Frequency of a mutated CCR-5 allele (delta32) among Italian healthy donors and individuals at risk of parenteral HIV infection. *AIDS Res Hum Retroviruses* 15: 337–344.
