# Supplementary material
Source: PubMed Central journal article supplement (PMC1283370)

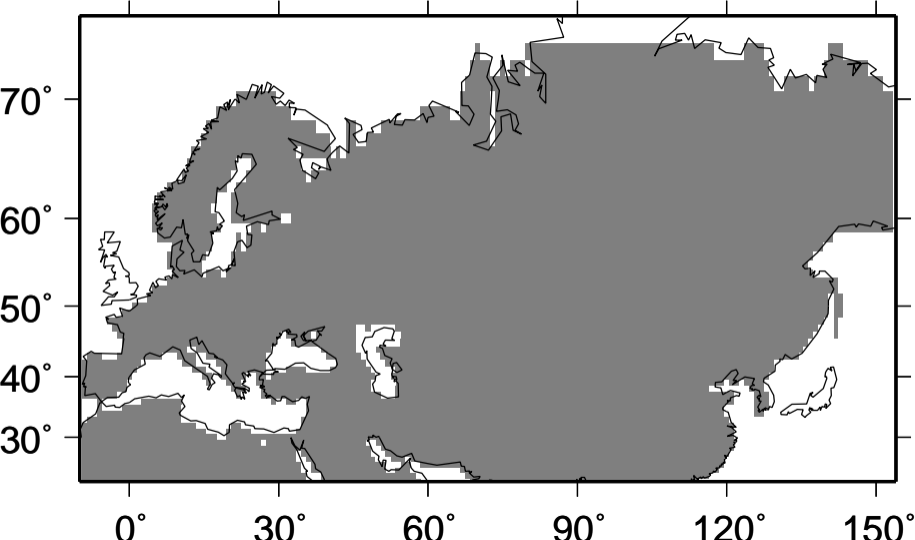

Supplement: pbio.0030339.sg001.pdf [file pbio.0030339.sg001.pdf]
